# Supplementary material for: Rapid test detection of anti-infliximab antibodies: performance comparison with three different immunoassays
Source: PubMed Central journal article supplement (PMC7682213; doi:10.1177/1756284820965790), 2020-11-18
Supplement: sj-pdf-1-tag-10.1177_1756284820965790.pdf [file sj-pdf-1-tag-10.1177_1756284820965790.pdf]

## SUPPLEMENTARY TABLES

**Table 1** Number of IFX/ATIs levels for each test in addition to the comparisons between tests.

| Assay                                 | n (%)      |            |             |             |
|---------------------------------------|------------|------------|-------------|-------------|
|                                       | IFX+/ATIs+ | IFX+/ATIs- | IFX-/ATIs+  | IFX-/ATIs-  |
| <b>Analytical cutoffs<sup>a</sup></b> |            |            |             |             |
| QB rapid test                         | 0 (0.0%)   | 90 (45.0%) | 48 (24.0%)  | 62 (31.0%)  |
| In-House                              | 53 (26.5%) | 37 (18.5%) | 108 (54.0%) | 2 (1.0%)    |
| Theradiag                             | 1 (0.5%)   | 89 (44.5%) | 96 (48.0%)  | 14 (7.0%)   |
| Immundiagnostik                       | 50 (25.0%) | 40 (20.0%) | 110 (55.0%) | 0 (0.0%)    |
| <b>Clinical cutoffs<sup>b</sup></b>   |            |            |             |             |
| QB rapid test                         | 0 (0.0%)   | 80 (40.0%) | 30 (15.0%)  | 90 (45.0%)  |
| In-House                              | 30 (15.0%) | 50 (25.0%) | 109 (54.5%) | 11 (5.5%)   |
| Theradiag                             | 0 (0.0%)   | 80 (40.0%) | 0 (0.0%)    | 120 (60.0%) |
| Immundiagnostik                       | 41 (20.5%) | 39 (19.5%) | 119 (59.5%) | 1 (0.5%)    |

ATIs, anti-infliximab antibodies; ATIs+, ATIs-positive levels; ATIs-, ATIs-negative levels; IFX, infliximab; IFX+, IFX-positive levels; IFX-, undetectable IFX levels; QB, Quantum Blue; n, number of samples for each IFX/ATIs status in a total of 200 samples.

<sup>a</sup>ATIs+ levels:  $\geq 0.6$   $\mu\text{g/mL}$  for QB rapid test,  $\geq 1.2$   $\mu\text{g/mL}$  for In-House,  $\geq 0.01$   $\mu\text{g/mL}$  for Theradiag, and  $\geq 10$  AU/mL for Immundiagnostik. IFX+ levels:  $\geq 0.4$   $\mu\text{g/mL}$ .

<sup>b</sup>ATIs+ levels:  $\geq 1.7$   $\mu\text{g/mL}$  for QB rapid test, In-House and Theradiag, and  $\geq 10$  AU/mL for Immundiagnostik. IFX+ levels:  $\geq 0.4$   $\mu\text{g/mL}$

**Table 2** Qualitative agreement between QB rapid test and the three established enzyme-linked immunosorbent assays (ELISAs) in the IFX negative samples/ATIs positive and negative samples

| Assay comparison                      | n (%)      |            | Cohen's kappa<br>(95% CI) |
|---------------------------------------|------------|------------|---------------------------|
|                                       | IFX-/ATIs+ | IFX-/ATIs- |                           |
| <b>Analytical cutoffs<sup>a</sup></b> |            |            |                           |
| QB rapid test versus In-House         | 46 (23.0%) | 3 (1.5%)   | 0.040 (0.000-0.200)       |
| QB rapid test versus Theradiag        | 46 (23.0%) | 15 (7.5%)  | 0.204 (0.038-0.369)       |
| QB rapid test versus Immundiagnostik  | 46 (23.0%) | 0 (0.0%)   | -                         |
| <b>Clinical cutoffs<sup>b</sup></b>   |            |            |                           |
| QB rapid test versus In-House         | 30 (15.0%) | 15 (7.5%)  | 0.091 (0.000-0.217)       |
| QB rapid test versus Theradiag        | 0 (0.0%)   | 90 (45.5%) | -                         |
| QB rapid test versus Immundiagnostik  | 30 (15.0%) | 1 (0.5%)   | 0.056 (0.000-0.017)       |

ATIs, anti-infliximab antibodies; ATIs+, ATIs-positive levels; ATIs-, ATIs-negative levels; CI, confidence interval; IFX, infliximab; IFX-, undetectable IFX levels; QB, Quantum Blue; n, number of matching samples between assays for each IFX/ATIs status in a total of 200 samples.

<sup>a</sup>ATIs+ levels:  $\geq 0.6$   $\mu\text{g/mL}$  for QB rapid test,  $\geq 1.2$   $\mu\text{g/mL}$  for In-House,  $\geq 0.01$   $\mu\text{g/mL}$  for Theradiag, and  $\geq 10$  AU/mL for Immundiagnostik. IFX+ levels:  $\geq 0.4$   $\mu\text{g/mL}$ .

<sup>b</sup>ATIs+ levels:  $\geq 1.7$   $\mu\text{g/mL}$  for QB rapid test, In-House and Theradiag, and  $\geq 10$  AU/mL for Immundiagnostik. IFX+ levels:  $\geq 0.4$   $\mu\text{g/mL}$
